# Supplementary material for: Maternal polycystic ovary syndrome and Offspring’s Risk of Cardiovascular diseases in Childhood and Young Adulthood
Source: Springer Nature journal article supplement (doi:10.1038/s41467-024-54795-w), 2024-11-29
Supplement: MOESM1 [file 41467_2024_54795_MOESM1_ESM.pdf]

## **Supplementary Information**

### **Maternal polycystic ovary syndrome and offspring's risk of cardiovascular diseases in childhood and young adulthood**

#### **Tables of Contents**

**Supplementary Table 1.** Hazard ratios and 95% confidence intervals for overall cardiovascular disease in the offspring according to maternal polycystic ovary syndrome, by attained age

**Supplementary Table 2.** Sub-analyses of the association between maternal polycystic ovary syndrome and cardiovascular disease in offspring

**Supplementary Table 3.** Hazard ratios and 95% confidence intervals for overall and specific cardiovascular diseases in offspring according to maternal polycystic ovary syndrome in the propensity-score-matched sub-cohort

**Supplementary Table 4.** Description of the Danish and Swedish national registers used in our study

**Supplementary Table 5.** International Classification of Diseases codes for polycystic ovary syndrome and cardiovascular disease

**Supplementary Table 6.** Baseline characteristics of the propensity-score-matched sub-cohort

**Supplementary Figure 1.** Cumulative incidence of overall cardiovascular disease in offspring according to maternal polycystic ovary syndrome

**Supplementary note 1.** Description of the source, measurement, and categorization of covariates

**Supplementary note 2.** Description of the mediation analysis

**Supplementary Table 1. Hazard ratios and 95% confidence intervals for overall cardiovascular disease in offspring according to maternal polycystic ovary syndrome, by attained age**

| Exposure                                          | Number of events | Event rate, per 10,000 person-years | HR (95% CI)          |                      |
|---------------------------------------------------|------------------|-------------------------------------|----------------------|----------------------|
|                                                   |                  |                                     | Model 1 <sup>a</sup> | Model 2 <sup>b</sup> |
| Attained age <sup>c</sup> <10 years (N=6 839 703) |                  |                                     |                      |                      |
| No PCOS                                           | 56 445           | 8.98                                | 1.0 (Reference)      | 1.0 (Reference)      |
| PCOS                                              | 729              | 17.10                               | 1.87 (1.74-2.01)     | 1.22 (1.13-1.31)     |
| 10 ≤ Attained age ≤ 19 years (N=5 619 120)        |                  |                                     |                      |                      |
| No PCOS                                           | 74 881           | 15.71                               | 1.0 (Reference)      | 1.0 (Reference)      |
| PCOS                                              | 376              | 22.05                               | 1.55 (1.40-1.71)     | 1.14 (1.03-1.26)     |
| 20 ≤ Attained age ≤ 29 years (N=3 963 638)        |                  |                                     |                      |                      |
| No PCOS                                           | 121 440          | 38.78                               | 1.0 (Reference)      | 1.0 (Reference)      |
| PCOS                                              | 267              | 49.07                               | 1.32 (1.17-1.48)     | 1.22 (1.08-1.37)     |
| 30 ≤ Attained age ≤ 39 years (N=2 267 578)        |                  |                                     |                      |                      |
| No PCOS                                           | 104 457          | 68.72                               | 1.0 (Reference)      | 1.0 (Reference)      |
| PCOS                                              | 100              | 76.44                               | 1.14 (0.94-1.39)     | 1.16 (0.95-1.41)     |
| Attained age ≥ 40 years (N=835 515)               |                  |                                     |                      |                      |
| No PCOS                                           | 25 559           | 86.56                               | 1.0 (Reference)      | 1.0 (Reference)      |
| PCOS                                              | 20               | 136.55                              | 1.60 (1.04-2.48)     | 1.58 (1.02-2.46)     |

Abbreviations: PCOS, polycystic ovary syndrome; HR, hazard ratio; CI, confidence interval.

<sup>a</sup> Model 1 was unadjusted.

<sup>b</sup> Model 2 was adjusted for sex, country and calendar year of birth, maternal country of origin, parity, age, education, and marital status at the time of birth, hypertensive disorders, diabetes, and psychiatric disorders before or during the index pregnancy, and family history of cardiovascular disease.

<sup>c</sup> Attained age refers to the age of study participants from their entry into the cohort to their exit from the cohort (i.e., having a CVD diagnosis, death, emigration, or the latest date in our available datasets); i.e. attained age is equivalent to the age at the respective follow-up.

**Supplementary Table 2. Sub-analyses of the association between maternal polycystic ovary syndrome and cardiovascular disease in offspring**

| Exposure                                                                                          | Number of events | Event rate, per 10 000 person-years | HR (95% CI)          |                      |
|---------------------------------------------------------------------------------------------------|------------------|-------------------------------------|----------------------|----------------------|
|                                                                                                   |                  |                                     | Model 1 <sup>a</sup> | Model 2 <sup>b</sup> |
| Stratified analysis according to offspring's sex                                                  |                  |                                     |                      |                      |
| Boy                                                                                               |                  |                                     |                      |                      |
| No PCOS                                                                                           | 189 274          | 23.03                               | 1.0 (Reference)      | 1.0 (Reference)      |
| PCOS                                                                                              | 791              | 23.00                               | 1.53 (1.44-1.65)     | 1.20 (1.11-1.28)     |
| Girl                                                                                              |                  |                                     |                      |                      |
| No PCOS                                                                                           | 193 508          | 24.89                               | 1.0 (Reference)      | 1.0 (Reference)      |
| PCOS                                                                                              | 701              | 21.77                               | 1.53 (1.43-1.65)     | 1.22 (1.13-1.32)     |
| P-value for multiplicative interaction between PCOS and sex                                       |                  |                                     | 0.007                | 0.008                |
| Stratified analysis according to offspring's country of birth                                     |                  |                                     |                      |                      |
| Denmark                                                                                           |                  |                                     |                      |                      |
| No PCOS                                                                                           | 130 768          | 23.36                               | 1.0 (Reference)      | 1.0 (Reference)      |
| PCOS                                                                                              | 451              | 20.88                               | 1.50 (1.37-1.65)     | 1.20 (1.09-1.31)     |
| Sweden                                                                                            |                  |                                     |                      |                      |
| No PCOS                                                                                           | 252 014          | 24.22                               | 1.0 (Reference)      | 1.0 (Reference)      |
| PCOS                                                                                              | 1041             | 23.14                               | 1.55 (1.46-1.64)     | 1.21 (1.13-1.28)     |
| P-value for multiplicative interaction between PCOS and country of birth                          |                  |                                     | 0.01                 | 0.03                 |
| Stratified analysis according to maternal ART                                                     |                  |                                     |                      |                      |
| Without ART                                                                                       |                  |                                     |                      |                      |
| No PCOS                                                                                           | 380 506          | 23.96                               | 1.0 (Reference)      | 1.0 (Reference)      |
| PCOS                                                                                              | 1320             | 22.69                               | 1.57 (1.48-1.65)     | 1.20 (1.14-1.27)     |
| With ART                                                                                          |                  |                                     |                      |                      |
| No PCOS                                                                                           | 2276             | 19.75                               | 1.0 (Reference)      | 1.0 (Reference)      |
| PCOS                                                                                              | 172              | 20.44                               | 1.09 (0.93-1.27)     | 1.06 (0.90-1.24)     |
| P-value for multiplicative interaction between PCOS and ART                                       |                  |                                     | <0.0001              | 0.09                 |
| Restricted to offspring with complete data on maternal smoking (N=4 617 257) <sup>c</sup>         |                  |                                     |                      |                      |
| No PCOS                                                                                           | 163 096          | 19.47                               | 1.0 (Reference)      | 1.0 (Reference)      |
| PCOS                                                                                              | 1187             | 21.00                               | 1.43 (1.35-1.51)     | 1.20 (1.14-1.27)     |
| Restricted to offspring with complete data on maternal body-mass index (N=3 565 133) <sup>d</sup> |                  |                                     |                      |                      |
| No PCOS                                                                                           | 273 507          | 25.95                               | 1.0 (Reference)      | 1.0 (Reference)      |
| PCOS                                                                                              | 595              | 25.43                               | 1.57 (1.45-1.70)     | 1.25 (1.16-1.36)     |
| Restricted to offspring born in Denmark since 1995 and in Sweden since 2001 (N=2 765 917)         |                  |                                     |                      |                      |
| No PCOS                                                                                           | 49 500           | 15.51                               | 1.0 (Reference)      | 1.0 (Reference)      |
| PCOS                                                                                              | 798              | 19.00                               | 1.27 (1.18-1.36)     | 1.17 (1.09-1.25)     |
| Restricted to CVD cases identified from national patient registers                                |                  |                                     |                      |                      |
| No PCOS                                                                                           | 381 542          | 23.32                               | 1.0 (Reference)      | 1.0 (Reference)      |
| PCOS                                                                                              | 1488             | 21.39                               | 1.54 (1.46-1.62)     | 1.20 (1.14-1.27)     |
| Year of PCOS diagnosis <sup>e</sup>                                                               |                  |                                     |                      |                      |

|                                                                             |         |       |                  |                  |
|-----------------------------------------------------------------------------|---------|-------|------------------|------------------|
| No PCOS                                                                     | 382 782 | 23.93 | 1.0 (Reference)  | 1.0 (Reference)  |
| <1990                                                                       | 196     | 30.15 | 1.17 (1.02-1.35) | 1.21 (1.05-1.39) |
| 1990-2003                                                                   | 423     | 23.02 | 1.56 (1.42-1.71) | 1.23 (1.12-1.35) |
| >2003                                                                       | 873     | 20.92 | 1.75 (1.63-1.87) | 1.20 (1.12-1.28) |
| <b>Imputed data by multiple imputation by chained equations<sup>f</sup></b> |         |       |                  |                  |
| No PCOS                                                                     | 382 782 | 23.93 | 1.0 (Reference)  | 1.0 (Reference)  |
| PCOS                                                                        | 1492    | 22.41 | 1.59 (1.52-1.66) | 1.20 (1.15-1.26) |

Abbreviations: PCOS, polycystic ovary syndrome; ART, assisted reproductive treatment; HR, hazard ratio; CI, confidence interval.

<sup>a</sup> Model 1 was unadjusted.

<sup>b</sup> Model 2 was adjusted for sex, country and calendar year of birth, maternal origin of country, parity, age, education, and marital status at the time of birth, hypertensive disorders, diabetes, and psychiatric disorders before or during the index pregnancy, and family history of cardiovascular diseases.

<sup>c</sup> We further adjusted for maternal smoking in early pregnancy in addition to factors included in Model 2.

<sup>d</sup> We further adjusted for maternal body-mass index in early pregnancy in addition to factors included in Model 2.

<sup>e</sup> There were 2183 women who had a diagnosis of polycystic ovary syndrome before 1990, 111 23 between 1990 and 2003, and 38 417 after 2003.

<sup>f</sup> We imputed missing variables using multiple imputation by the chained equations method to generate five imputations. We used logistic regression to impute the following categorical variables: offspring's sex, maternal origin of country, education, and marital status.

**Supplementary Table 3. Hazard ratios and 95% confidence intervals for overall and specific cardiovascular diseases in offspring according to maternal polycystic ovary syndrome in the propensity score matched sub-cohort**

| Exposure                           | Number of events | Rate, per 10,000 person-years | Model 1 <sup>a</sup><br>HR (95% CI) | Model 2 <sup>b</sup><br>HR (95% CI) |
|------------------------------------|------------------|-------------------------------|-------------------------------------|-------------------------------------|
| <b>Overall CVD</b>                 |                  |                               |                                     |                                     |
| No PCOS                            | 2627             | 23.74                         | 1.0 (Reference)                     | 1.0 (Reference)                     |
| PCOS                               | 1492             | 22.41                         | 1.38 (1.29-1.48)                    | 1.19 (1.10-1.27)                    |
| <b>Ischemic heart disease</b>      |                  |                               |                                     |                                     |
| No PCOS                            | 47               | 0.42                          | 1.0 (Reference)                     | 1.0 (Reference)                     |
| PCOS                               | 20               | 0.30                          | 1.80 (1.03-3.15)                    | 1.76 (0.98-3.15)                    |
| <b>Acute myocardial infarction</b> |                  |                               |                                     |                                     |
| No PCOS                            | 18               | 0.16                          | 1.0 (Reference)                     | 1.0 (Reference)                     |
| PCOS                               | 8                | 0.12                          | 2.36 (0.98-5.71)                    | 2.51 (1.03-6.16)                    |
| <b>Stroke</b>                      |                  |                               |                                     |                                     |
| No PCOS                            | 92               | 0.81                          | 1.0 (Reference)                     | 1.0 (Reference)                     |
| PCOS                               | 44               | 0.65                          | 1.21 (0.82-1.78)                    | 1.05 (0.70-1.58)                    |
| <b>Haemorrhagic stroke</b>         |                  |                               |                                     |                                     |
| No PCOS                            | 25               | 0.22                          | 1.0 (Reference)                     | 1.0 (Reference)                     |
| PCOS                               | 13               | 0.19                          | 1.12 (0.55-2.27)                    | 1.02 (0.48-2.17)                    |
| <b>Ischemic stroke</b>             |                  |                               |                                     |                                     |
| No PCOS                            | 54               | 0.48                          | 1.0 (Reference)                     | 1.0 (Reference)                     |
| PCOS                               | 29               | 0.43                          | 1.46 (0.89-2.38)                    | 1.16 (0.39-1.95)                    |
| <b>Heart failure</b>               |                  |                               |                                     |                                     |
| No PCOS                            | 38               | 0.34                          | 1.0 (Reference)                     | 1.0 (Reference)                     |
| PCOS                               | 12               | 0.18                          | 0.66 (0.33-1.31)                    | 0.72 (0.35-1.49)                    |
| <b>Atrial fibrillation</b>         |                  |                               |                                     |                                     |
| No PCOS                            | 62               | 0.55                          | 1.0 (Reference)                     | 1.0 (Reference)                     |
| PCOS                               | 18               | 0.27                          | 0.99 (0.58-1.72)                    | 1.18 (0.68-2.05)                    |
| <b>Hypertensive disorders</b>      |                  |                               |                                     |                                     |
| No PCOS                            | 349              | 3.09                          | 1.0 (Reference)                     | 1.0 (Reference)                     |
| PCOS                               | 146              | 2.16                          | 1.54 (1.26-1.89)                    | 1.38 (1.11-1.71)                    |
| <b>Peripheral arterial disease</b> |                  |                               |                                     |                                     |
| No PCOS                            | 10               | 0.09                          | 1.0 (Reference)                     | 1.0 (Reference)                     |
| PCOS                               | 6                | 0.09                          | 1.46 (0.50-4.27)                    | 1.77 (0.58-5.38)                    |

Abbreviations: PCOS, polycystic ovary syndrome; CVD, cardiovascular disease; HR, hazard ratio; CI, confidence interval.

<sup>a</sup> Model 1 was unadjusted.

<sup>b</sup> Model 2 was adjusted for sex, country and calendar year of birth, and maternal age at the time of birth.

**Supplementary Table 4. Description of the Danish and Swedish national registers used in our study**

| <b>Data source</b>                                    | <b>Information retrieved from the register</b>                                                                                                                                                   | <b>Period covered</b>                                                                                         |
|-------------------------------------------------------|--------------------------------------------------------------------------------------------------------------------------------------------------------------------------------------------------|---------------------------------------------------------------------------------------------------------------|
| <b>The Danish registers</b>                           |                                                                                                                                                                                                  |                                                                                                               |
| Danish Civil Registration System                      | Sex, birth date, place of birth, vital status, marital status, emigration and immigration, and linkage to relatives                                                                              | 1968-2016                                                                                                     |
| Danish Integrated Database for Labour Market Research | Mother's education level                                                                                                                                                                         | 1980-2016                                                                                                     |
| Danish Medical Birth Register                         | Birth date, sex, gestational age, birth weight, singleton status, mother's height, weight, and smoking in early pregnancy, age at delivery and parity                                            | 1973-2016                                                                                                     |
| Danish National Patient Registry                      | Information on inpatient and outpatient care (diagnosis, date)                                                                                                                                   | Inpatient care: 1977-2016; specialized outpatient care and emergency department contacts: 1995-2016           |
| Danish Register of Causes of Death                    | Date of death and cause of death                                                                                                                                                                 | 1970-2016                                                                                                     |
| <b>The Swedish registers</b>                          |                                                                                                                                                                                                  |                                                                                                               |
| Swedish Total Population Register                     | Sex, birth date, place of birth, marital status, migration, and civil status                                                                                                                     | 1968-2014                                                                                                     |
| Swedish Multi-Generation Register                     | Relationships for all residents born since 1932 <sup>a</sup>                                                                                                                                     | 1961-2014                                                                                                     |
| Swedish Register of Education                         | Mother's education                                                                                                                                                                               | 1985-2014                                                                                                     |
| Swedish Medical Birth Register                        | Birth date, sex, gestational age, birth weight, singleton status, mother's height, weight, and smoking status in early pregnancy, age at delivery and parity, and complications during pregnancy | 1973-2014                                                                                                     |
| Swedish Patient Register                              | Information on inpatient and outpatient care (diagnosis, date)                                                                                                                                   | Inpatient care: 1964-2020 (its coverage became nationwide since 1987); specialized outpatient care: 2001-2020 |
| Swedish Cause of Death Register                       | Date and cause of death                                                                                                                                                                          | 1952-2020                                                                                                     |

<sup>a</sup> The index persons must have been registered since 1961 in order to be included.

**Supplementary Table 5. International Classification of Diseases codes for polycystic ovary syndrome and cardiovascular diseases**

|                                                              | ICD-8                      | ICD-9                           | ICD-10                   |
|--------------------------------------------------------------|----------------------------|---------------------------------|--------------------------|
| <b>Polycystic ovary syndrome</b>                             |                            |                                 |                          |
| Denmark                                                      | 25690                      |                                 | E282                     |
| Sweden                                                       | 25690                      | 256E                            | E282                     |
| <b>Overall cardiovascular disease</b>                        |                            |                                 |                          |
| Denmark                                                      | 390-458                    |                                 | I00-I99                  |
| Sweden                                                       | 390-458                    | 390-459                         | I00-I99                  |
| <b>Ischemic heart disease</b>                                |                            |                                 |                          |
| Denmark                                                      | 410-414                    |                                 | I20-I25                  |
| Sweden                                                       | 410-414                    | 410-414                         | I20-I25                  |
| <b>Acute myocardial infarction</b>                           |                            |                                 |                          |
| Denmark                                                      | 410                        |                                 | I21, I22                 |
| Sweden                                                       | 410                        | 410                             | I21, I22                 |
| <b>Stroke</b>                                                |                            |                                 |                          |
| Denmark                                                      | 430, 431, 433, 434, 436    |                                 | I60, I61, I63, I64       |
| Sweden                                                       | 430, 431, 433, 434, 436    | 430, 431, 433, 434, 436         | I60, I61, I63, I64       |
| <b>Haemorrhagic stroke (except subarachnoid haemorrhage)</b> |                            |                                 |                          |
| Denmark                                                      | 431                        |                                 | I61                      |
| Sweden                                                       | 431                        | 431                             | I61                      |
| <b>Ischemic stroke</b>                                       |                            |                                 |                          |
| Denmark                                                      | 433, 434                   |                                 | I63, I64                 |
| Sweden                                                       | 433, 434                   | 433, 434                        | I63, I64                 |
| <b>Heart failure</b>                                         |                            |                                 |                          |
| Denmark                                                      | 42709, 42710, 42711, 42719 |                                 | I110, I130, I132, I50    |
| Sweden                                                       | 427.00, 427.10             | 428                             | I11.0, I13.0, I13.2, I50 |
| <b>Atrial fibrillation/flutter</b>                           |                            |                                 |                          |
| Denmark                                                      | 42793, 42794               |                                 | I48                      |
| Sweden                                                       | 427.92                     | 427D                            | I48                      |
| <b>Hypertensive disease</b>                                  |                            |                                 |                          |
| Denmark                                                      | 400-404                    |                                 | I10-I15, O10, O11        |
| Sweden                                                       | 400-404                    | 401-405, 642A, 642B, 642C, 642H | I10-I15, O10, O11        |
| <b>Peripheral arterial disease</b>                           |                            |                                 |                          |
| Denmark                                                      | 440, 44399, 445            |                                 | I70, I739                |
| Sweden                                                       | 440, 4438, 4439, 445       | 440, 443W, 443X                 | I70, I73.9               |

Abbreviation: ICD, International Statistical Classification of Diseases and Related Health Problems.

Polycystic ovary syndrome diagnoses were extracted from the Danish and Swedish patient registers and the Swedish Medical Birth Register. Overall cardiovascular disease was identified using primary or secondary diagnoses in the national patient registers or from the underlying cause of death in the cause of death register. Ischemic heart disease, stroke, and heart failure were identified based on the primary diagnosis in the national patient registers or from the underlying cause of death in the cause of death register. Hypertensive disease, atrial fibrillation and peripheral artery disease were identified based on the primary or secondary diagnoses in national patient registers.

**Supplementary Table 6. Baseline characteristics of the propensity-score-matched sub-cohort**

| Characteristics                                          | Exposure                       |                             |
|----------------------------------------------------------|--------------------------------|-----------------------------|
|                                                          | No maternal PCOS<br>(N=51 723) | Maternal PCOS<br>(N=51 723) |
|                                                          | N (%)                          | N (%)                       |
| <b>Characteristics of the offspring</b>                  |                                |                             |
| <b>Study country</b>                                     |                                |                             |
| Denmark                                                  | 19 516 (37.3)                  | 20 235 (39.1)               |
| Sweden                                                   | 32 207 (62.3)                  | 31 488 (60.9)               |
| <b>Calendar year of birth</b>                            |                                |                             |
| 1973-1978                                                | 5252 (10.2)                    | 523 (1.0)                   |
| 1979-1984                                                | 5631 (10.9)                    | 1088 (2.1)                  |
| 1985-1990                                                | 6811 (13.2)                    | 2054 (4.0)                  |
| 1991-1996                                                | 7540 (14.6)                    | 3971 (7.7)                  |
| 1997-2002                                                | 7137 (13.8)                    | 6428 (12.4)                 |
| 2003-2008                                                | 8493 (16.4)                    | 13 267 (25.7)               |
| 2009-2016                                                | 10 859 (21.0)                  | 24 392 (47.2)               |
| <b>Sex</b>                                               |                                |                             |
| Boy                                                      | 26 622 (51.5)                  | 26 683 (51.6)               |
| Girl                                                     | 25 094 (48.5)                  | 25 040 (48.4)               |
| Unknown                                                  | 7 (0.01)                       | 0                           |
| <b>Congenital heart disease</b>                          |                                |                             |
| No                                                       | 50 890 (98.4)                  | 50 480 (97.6)               |
| Yes                                                      | 833 (1.6)                      | 1243 (2.4)                  |
| <b>Preterm birth</b>                                     |                                |                             |
| No                                                       | 46 336 (89.6)                  | 47 536 (91.9)               |
| Yes                                                      | 2957 (5.7)                     | 3683 (7.1)                  |
| Unknown                                                  | 2430 (4.7)                     | 504 (1.0)                   |
| <b>Small for gestational age <sup>a</sup></b>            |                                |                             |
| No                                                       | 46 410 (89.7)                  | 47 419 (91.7)               |
| Yes                                                      | 5313 (10.3)                    | 4304 (8.3)                  |
| <b>Large for gestational age <sup>b</sup></b>            |                                |                             |
| No                                                       | 46 893 (90.7)                  | 44 900 (86.8)               |
| Yes                                                      | 4830 (9.3)                     | 6823 (13.2)                 |
| <b>Maternal characteristics</b>                          |                                |                             |
| <b>Country of origin same as the study country</b>       |                                |                             |
| No                                                       | 10 503 (20.3)                  | 10 550 (20.4)               |
| Yes                                                      | 41 217 (79.7)                  | 41 170 (79.6)               |
| Unknown                                                  | 3 (0.01)                       | 3 (0.01)                    |
| <b>Age (years) at the time of the index birth</b>        |                                |                             |
| ≤19                                                      | 1672 (3.2)                     | 1488 (2.9)                  |
| 20-24                                                    | 10 689 (20.7)                  | 9699 (18.8)                 |
| 25-29                                                    | 18 333 (35.4)                  | 17 895 (34.6)               |
| 30-34                                                    | 14 149 (27.4)                  | 15 671 (30.3)               |
| ≥35                                                      | 6880 (13.3)                    | 6970 (13.5)                 |
| <b>Level of education at the time of the index birth</b> |                                |                             |
| Primary and lower secondary                              | 9820 (19.0)                    | 9931 (19.2)                 |
| Upper secondary                                          | 22 046 (42.6)                  | 22 076 (42.7)               |
| Bachelor or higher                                       | 19 390 (37.5)                  | 19 240 (37.2)               |
| Unknown                                                  | 467 (0.9)                      | 476 (0.9)                   |



|                                                                            |               |               |
|----------------------------------------------------------------------------|---------------|---------------|
| <b>Marital status at the time of the index birth</b>                       |               |               |
| Not married/no registered partnership                                      | 26 499 (51.2) | 26 554 (51.3) |
| Married/registered partnership                                             | 24 858 (48.1) | 24 860 (48.1) |
| Unknown                                                                    | 366 (0.7)     | 319 (0.6)     |
| <b>Parity at the time of the index birth</b>                               |               |               |
| 1                                                                          | 28 826 (55.7) | 28 453 (55.0) |
| 2                                                                          | 16 931 (32.7) | 16 924 (32.7) |
| ≥3                                                                         | 5966 (11.5)   | 6346 (12.3)   |
| <b>Smoking in early pregnancy <sup>c</sup></b>                             |               |               |
| No                                                                         | 31 893 (79.0) | 41 577 (83.9) |
| Yes                                                                        | 6175 (15.3)   | 5953 (12.0)   |
| Unknown                                                                    | 2297 (5.7)    | 2020 (4.1)    |
| <b>Body-mass index in early pregnancy (kg/m<sup>2</sup>) <sup>d</sup></b>  |               |               |
| <18.5                                                                      | 1107 (3.2)    | 739 (1.64)    |
| 18.5-24.9                                                                  | 17 016 (48.9) | 16 424 (36.4) |
| 25.0-29.9                                                                  | 6819 (19.6)   | 11 850 (26.3) |
| ≥30.0                                                                      | 3222 (9.3)    | 11 264 (25.0) |
| Unknown                                                                    | 6615 (19.0)   | 4806 (10.7)   |
| <b>Assisted reproductive treatment during index pregnancy <sup>e</sup></b> |               |               |
| No                                                                         | 28 831 (96.5) | 38 028 (82.9) |
| Yes                                                                        | 1036 (3.5)    | 7869 (17.1)   |
| <b>Diabetes before or during index pregnancy</b>                           |               |               |
| No                                                                         | 48 787 (94.3) | 48 460 (93.7) |
| Yes                                                                        | 2936 (5.7)    | 3263 (6.3)    |
| <b>Hypertensive disorders before or during index pregnancy</b>             |               |               |
| No                                                                         | 47 445 (91.7) | 47 779 (92.4) |
| Yes                                                                        | 4278 (8.3)    | 3944 (7.6)    |
| <b>Psychiatric disorders before or during index pregnancy</b>              |               |               |
| No                                                                         | 45 764 (88.5) | 45 804 (88.6) |
| Yes                                                                        | 5959 (12.5)   | 5919 (11.4)   |
| <b>Family history of cardiovascular disease before the index birth</b>     |               |               |
| No                                                                         | 29 157 (56.4) | 28 676 (55.4) |
| Yes                                                                        | 22 566 (43.6) | 23 047 (44.6) |

Abbreviation: PCOS, polycystic ovary syndrome.

<sup>a</sup> Small for gestational age, birth weight below the 10<sup>th</sup> percentile of the sex-specific standard curve for normal fetal growth.

<sup>b</sup> Large for gestational age, birth weight above the 10<sup>th</sup> percentile of the sex-specific standard curve for normal fetal growth.

<sup>c</sup> Maternal smoking was available since 1982 in Sweden and since 1991 in Denmark.

<sup>d</sup> Maternal body-mass index has been available since 1982 in Sweden and since 2003 in Denmark.

<sup>e</sup> Maternal assisted reproductive treatment has been available since 1994 in Denmark and since 1995 in Sweden.

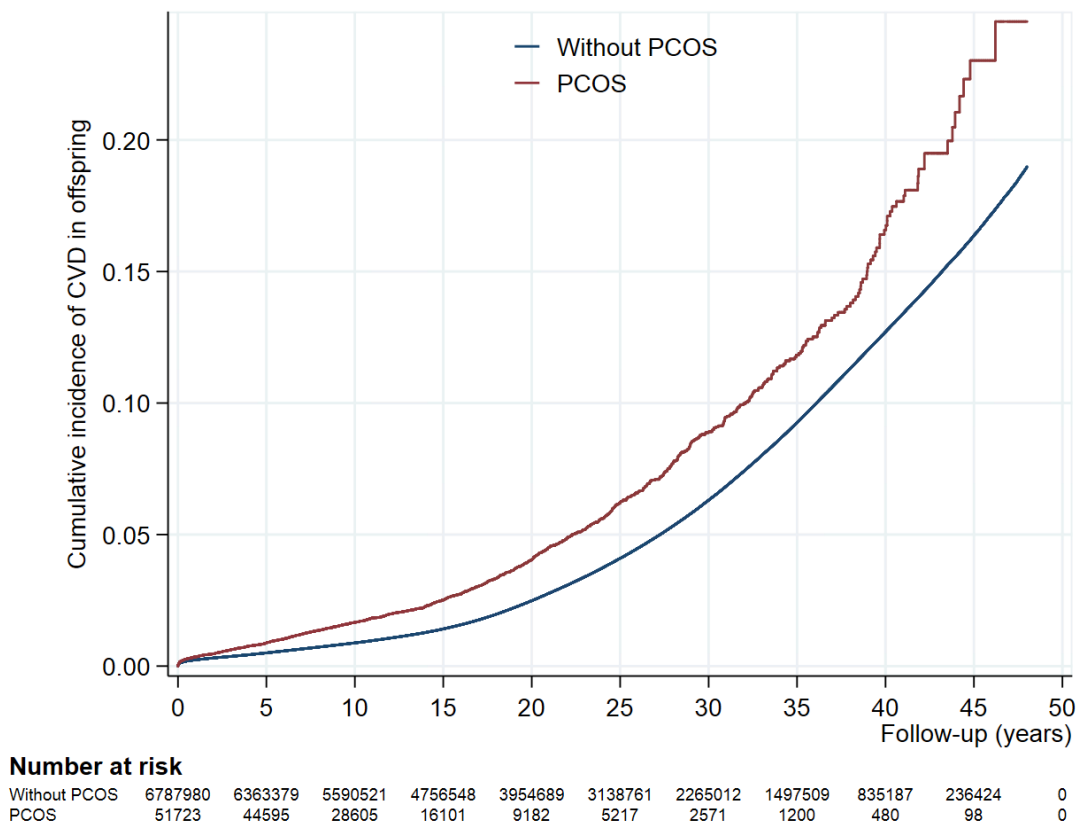

**Supplementary Figure 1. Cumulative incidence of overall cardiovascular disease in offspring according to maternal polycystic ovary syndrome**  
 PCOS, polycystic ovary syndrome.

## **Supplementary note 1. Description of the source, measurement, and categorization of covariates**

### **1. Offspring characteristics**

Sex (boy or girl), calendar year of birth (1973-1978, 1979-1984, 1985-1990, 1991-1996, 1997-2002, 2003-2008, or 2009-2016), gestational age, and birth weight were obtained from the Danish and Swedish Medical Birth Registers. Preterm birth (yes/no) was defined as gestational age < 37 weeks at birth. Birth weight for gestational age was calculated according to the Scandinavian sex-specific reference curve for normal foetal growth, and further categorized into small for gestational age (<10th percentile), appropriate for gestational age (between the 10th and 90th percentile), and large for gestational age (>90th percentile).

Diagnoses of congenital heart disease were obtained from the Danish National Patient Register (DNPR) and the Swedish Patient Register (SPR), using the following *International Statistical Classification of Diseases and Related Health Problems* (ICD) codes: 1) in Denmark: ICD-8: 746, 747; ICD-10: Q20-Q27; and 2) in Sweden: ICD-8: 746, 747; ICD-9: 745, 746, 747; ICD-10: Q20-Q27. Diagnoses of diabetes were obtained from the DNPR, and SPR using the ICD codes: 1) in Denmark: ICD-8: 250 and ICD-10: E10-E14; and 2) in Sweden: ICD-8: ICD-8/9: 250 and ICD-10: E10-E14.

### **2. Maternal characteristics**

Information on maternal country of origin (same as the study country or not) and marital status (married/registered partnership versus not) was obtained from the Danish Civil Registration System and the Swedish Total Population Register. Maternal educational level (primary and lower secondary, upper secondary, bachelor, or higher) was extracted from the Danish Integrated Database for Labour Market Research and the Swedish Register of Education.

From the Danish and Swedish Medical Birth Registers, we extracted information on maternal age ( $\leq 19$ , 20-24, 25-29, 30-34, or  $\geq 35$  years), parity (1, 2,  $\geq 3$ ) and assisted reproductive treatment (available since 1994 in Denmark and since 1995 in Sweden) at the time of birth, smoking (available since 1991 in Denmark and since 1982 in Sweden), and body-mass index

(available since 2003 in Denmark and since 1982 in Sweden) in early pregnancy. Body-mass index was further classified as underweight ( $<18.5 \text{ kg/m}^2$ ), normal weight ( $18.5\text{--}24.9 \text{ kg/m}^2$ ), overweight ( $25.0\text{--}29.9 \text{ kg/m}^2$ ), and obesity ( $\geq 30 \text{ kg/m}^2$ ).

Maternal comorbidities before or during the index pregnancy, including diabetes, hypertensive disease, and psychiatric disorders, were retrieved from the DNPR and the Swedish Medical Birth Register. Maternal diabetes was identified using the following ICD codes: 1) in Denmark: ICD-8: 249, 250; ICD-10: E10-E14, O24; and 2) in Sweden: ICD-8: 250; ICD-9: 250, 648A, 648W; ICD-10: E10-E14, O24. Maternal hypertensive disease was identified using the following ICD codes: 1) in Denmark: ICD-8: 40009, 40019, 40029, 40039, 40099, 40199, 63700, 63703, 63704, 63709, 63719, 76029; ICD-10: I10, I11, I12, I13, I15, O10, O11, O13, O14, O15, O16; and 2) in Sweden: ICD-8: 400, 401, 402, 403, 404, 63701, 63703, 63704, 63709, 63799, 63710; ICD-9: 401, 402, 403, 404, 405, 642A, 642B, 642C, 642D, 642E, 642F, 642G, 642H, 642X; ICD-10: I10, I11, I12, I13, I15, O10, O11, O13, O14, O15, O16. Maternal psychiatric disorders were identified using the following ICD codes: 1) Denmark: ICD-8: 290-315; ICD-10: F00-F99; and 2) in Sweden: ICD-8: 290-315; ICD-9: 290-319; and ICD-10: F00-F99.

Maternal family history of cardiovascular diseases was defined as a history of cardiovascular diseases among first-degree relatives. A mother's family relatives were identified through the Danish Civil Registration System and the Swedish Multi-Generation Register. We then extracted information on maternal relatives' cardiovascular disease diagnoses (ICD-8/9: 390–459, ICD-10: I00-I99) from the DNPR and SPR.

## Supplementary note 2. Description of the mediation analysis

We explored the role of several potential mediators, i.e. preterm birth, small and large for gestational age (SGA and LGA), congenital heart disease, and diabetes in the association between maternal polycystic ovary syndrome (PCOS, the exposure of interest) and cardiovascular diseases (CVD, the outcome of interest) among offspring.

We performed the mediation analysis based on the counterfactual framework, which has been extensively described elsewhere.<sup>1</sup> We obtained the total effect of PCOS on the risk of CVD in offspring by comparing CVD risk among offspring exposed to maternal PCOS with that of unexposed offspring, broken down into direct and mediated effects. The direct effect (DE) represents the effect of maternal PCOS on CVD that was independent of preterm birth, SGA or LGA birth, and congenital heart disease. The mediated effect (ME) reflected the influence of maternal PCOS that could be explained by its influence on mediators. The proportion mediated by each mediator was then estimated as:  $[DE \times (ME - 1) / (DE \times ME) - 1] \times 100\%$ , where 0% reflects no mediated effect and 100% reflects no direct effect. We employed the SAS macro *%mediation* developed by Linda Valeri and Tyler Vanderweele<sup>2</sup> to perform the mediation analysis.

We modelled the exposure-mediator (*i.e.*, maternal PCOS-preterm birth, maternal PCOS-SGA birth, maternal PCOS-LGA birth, maternal PCOS- congenital heart disease, and maternal PCOS-diabetes) using logistic regression. The exposure-outcome (*i.e.*, maternal PCOS-offspring CVD) association was modelled using Cox regression, with an interaction term between the exposure and the mediator. We included the following covariates in the models: offspring's sex, country and year of birth, and maternal country of origin, parity, age, education, and marital status at the time of birth, BMI and smoking in early pregnancy, family history of CVD, hypertensive disease, diabetes, and psychiatric disorders before or during the index pregnancy.

As noted elsewhere,<sup>3</sup> the mediation analysis required strong assumptions: 1) no unmeasured exposure-outcome confounding, 2) no unmeasured exposure-mediator confounding, 3) no

unmeasured mediator-outcome confounding, and 4) none of the mediator-outcome confounders being affected by the exposure. Our observational data cannot rule out the possibility of unmeasured confounders, and the assumption of “no unmeasured mediator-outcome confounders” was especially likely to be violated. Therefore, we further examined the impact of unmeasured mediator-outcome confounding by using the sensitivity analysis technique.<sup>4</sup> Using congenital heart disease as an example, we first assumed that the effect of a strong unmeasured confounder  $U$  on CVD on the hazard ratio scale was 1.8, that the prevalence of  $U$  among offspring with congenital heart disease who were exposed to maternal PCOS was 40%, and that the prevalence of  $U$  among unexposed offspring with congenital heart disease was 45%. After introducing the  $U$  into the sensitivity analysis, we found that the direct effect was slightly increased (hazard ratio: 1.21, 95% confidence interval: 1.14-1.27), but the mediated effect was reduced and close to null (0.99, 0.98-0.99). We found similar patterns when we performed sensitivity analyses in case of diabetes, preterm birth and SGA or LGA birth.

### Supplementary References

1. Robins JM, Greenland SJE. Identifiability and exchangeability for direct and indirect effects. *Epidemiology*. 1992;143-155.
2. Valeri L, VanderWeele TJ. Mediation analysis allowing for exposure–mediator interactions and causal interpretation: theoretical assumptions and implementation with SAS and SPSS macros. *Psychological methods*. 2013;18(2):137.
3. Lange T, Hansen JVJE. Direct and indirect effects in a survival context. *Epidemiology*. 2011;575-581.
4. VanderWeele TJJoe. Unmeasured confounding and hazard scales: sensitivity analysis for total, direct, and indirect effects. *European journal of epidemiology*. 2013;28(2):113-117.
